# Supplementary material for: Structure-mechanics statistical learning uncovers mechanical relay in proteins
Source: Royal Society of Chemistry journal article supplement (doi:10.1039/d1sc06184d), 2022-01-01
Supplement: d1sc06184d1.pdf [file d1sc06184d1.pdf]

# Supporting Information for Structure-Mechanics Statistical Learning Uncovers Mechanical Relay in Proteins

Nixon Raj,<sup>†</sup> Timothy H. Click,<sup>†</sup> Haw Yang,<sup>‡</sup> and Jhih-Wei Chu\*,<sup>¶</sup>

*<sup>†</sup>Institute of Bioinformatics and Systems Biology, National Yang Ming Chiao Tung University, Hsinchu 30010, Taiwan, ROC*

*<sup>‡</sup>Department of Chemistry, Princeton University, Princeton, NJ 08544, USA*

*<sup>¶</sup>Institute of Bioinformatics and Systems Biology; Department of Biological Science and Technology; Institute of Molecular Medicine and Bioengineering; Center for Intelligent Drug Systems and Smart Bio-devices (IDS<sup>2</sup>B), National Yang Ming Chiao Tung University, Hsinchu 30010, Taiwan, ROC*

E-mail: jwchu@nctu.edu.tw

## Supporting Information Available

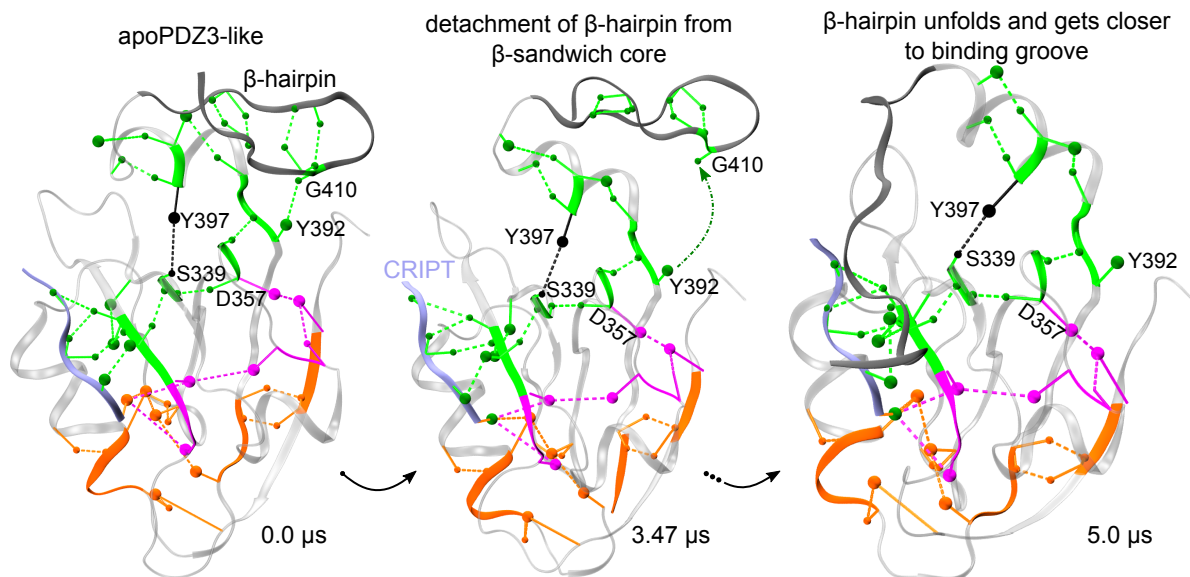

Figure S1: The inter-domain conformational change in PDZ3 upon CRIPT binding. Left: the initial structure of apoPDZ3. Center: the  $\beta$ -hairpin detachment ( $\Delta k_{G410-Y392}$  off) from the  $\beta$ -sandwich core. Right: the unfolding of the  $\beta_7$ - $\beta_8$  hairpin that comes close to the peptide binding groove. The  $\beta_7$ - $\beta_8$  hairpin is colored in gray, while the other secondary structures displayed in transparent silver. The three mechanical relay systems are also shown following the coloring scheme in Fig. 4 and Fig. 6(b). The CRIPT peptide is colored in ice-blue. The important Y397-S339 interaction persisting throughout the conformational change is shown in black.

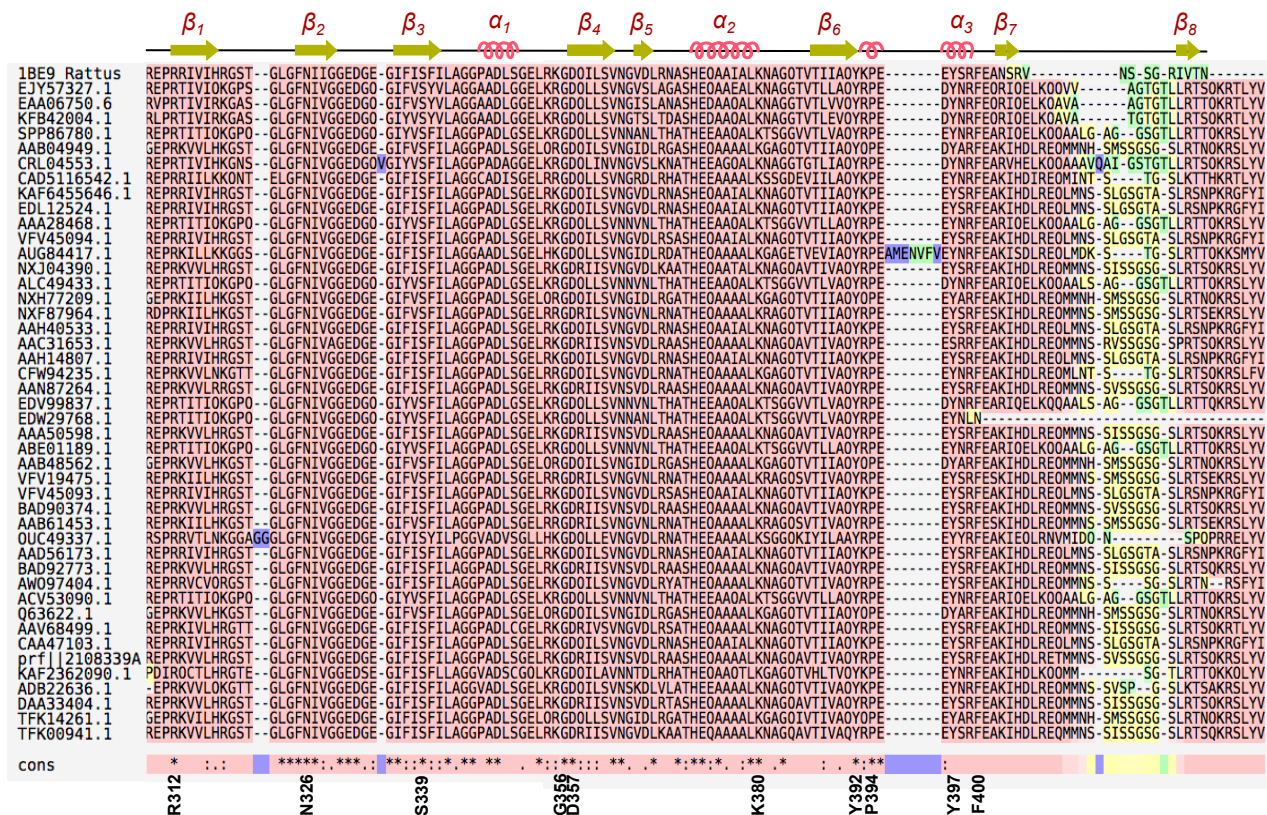

Figure S2: Multiple sequence alignment for the PDZ3 sequences containing the CT-extension  $\alpha_3$ . The prominent rigidity modes that contain residues involved in the mechanical communication with  $\alpha_3$ , i.e., inter-domain allostery, are highlighted to illustrate their very high levels of conservation. The asterisk label at bottom indicates the fully conserved residues in the MSA.
